# Supplementary material for: Red fluorescent carbon dots excited by visible light: cell imaging and visual detection of ammonia gas using PVB films
Source: Royal Society of Chemistry journal article supplement (doi:10.1039/d1nj04479f), 2021-01-01
Supplement: d1nj04479f1.pdf [file d1nj04479f1.pdf]

## Supporting Information

### Red Fluorescent Carbon Dots Excited by Visible Light: Cell Imaging and the Visual Detection of Ammonia in the PVB Films

Bingyan Han <sup>a,b</sup>\*, Jingmei Jiang <sup>a,b</sup>, Qifang Yan <sup>a,b</sup>, Jing Zhao <sup>c</sup>, Ze Xin <sup>a,b</sup>, Qin Yan <sup>a,b</sup>, Gaohong He <sup>a,b</sup>

<sup>a</sup> State Key Laboratory of Fine Chemicals, Dalian University of Technology, Dalian 116023, Liaoning, China.

<sup>b</sup> School of Chemical Engineering, Dalian University of Technology, Panjin 124221, Liaoning, China.

<sup>c</sup> School of Life Science and Medicine, Dalian University of Technology, Panjin 124221, Liaoning, China.

\*Corresponding author E-mail: [byhan@dlut.edu.cn](mailto:byhan@dlut.edu.cn); Tel: +86427-2631820.

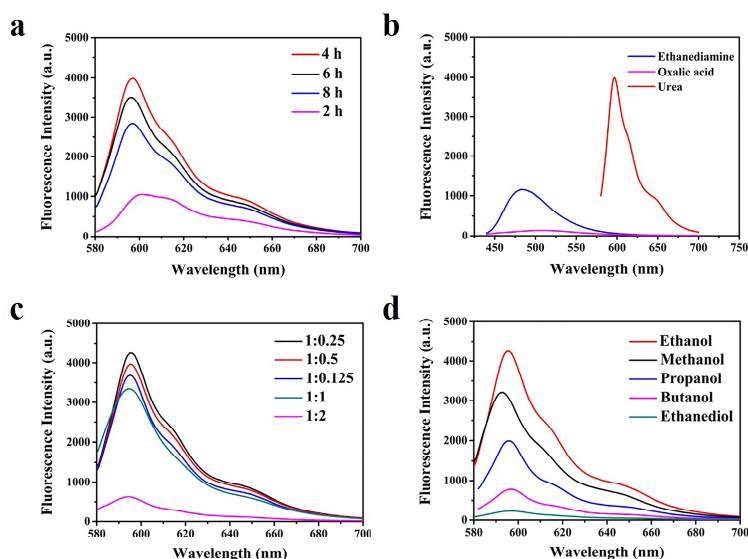

**Figure S1.** The fluorescence spectra of CDs under different (a) reagent reaction time, (b) the doping reagent, (c) mass ratio (m-dihydroxybenzene: urea) and (d) solvent.

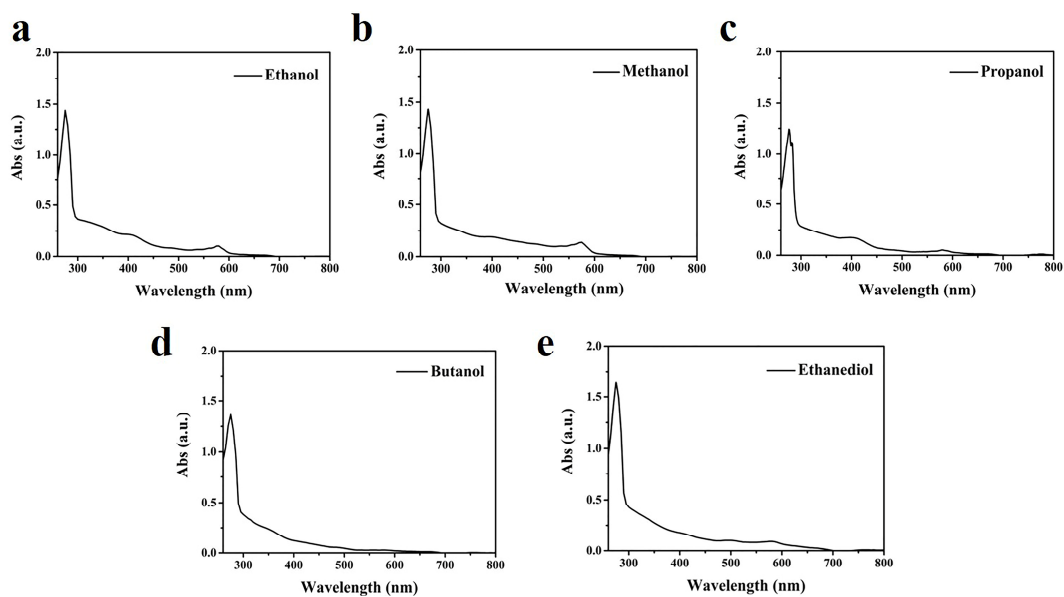

**Figure S2.** UV-vis spectra of CDs in different solvent (a) ethanol (b) methanol (c) propanol (d) butanol (e) ethanediol.

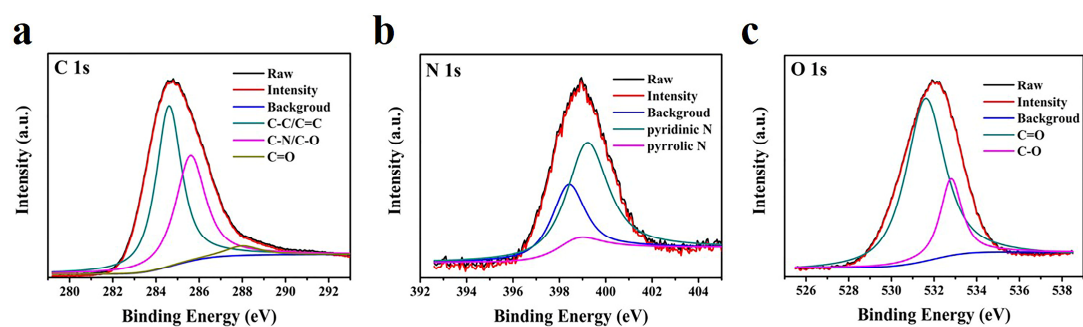

**Figure S3.** High-resolution XPS spectra of (a) C 1s, (b) N 1s, (c) O 1s of CDs.

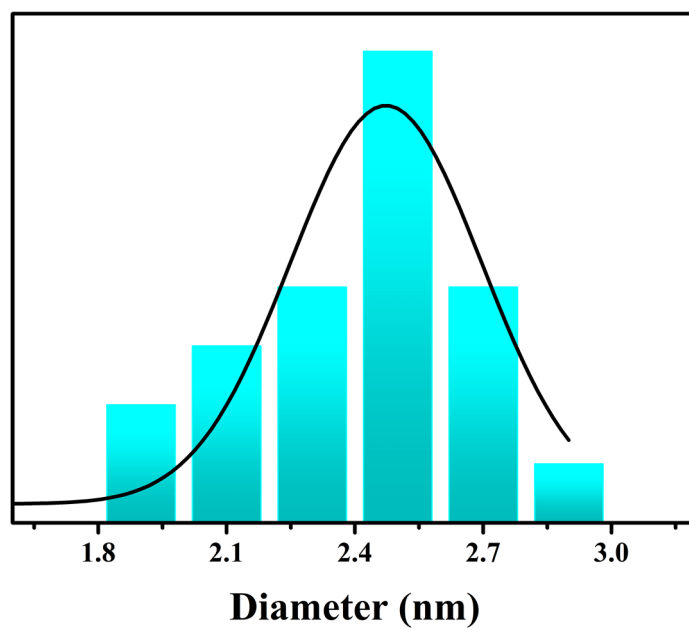

**Figure S4.** Particle size distribution histogram of CDs.

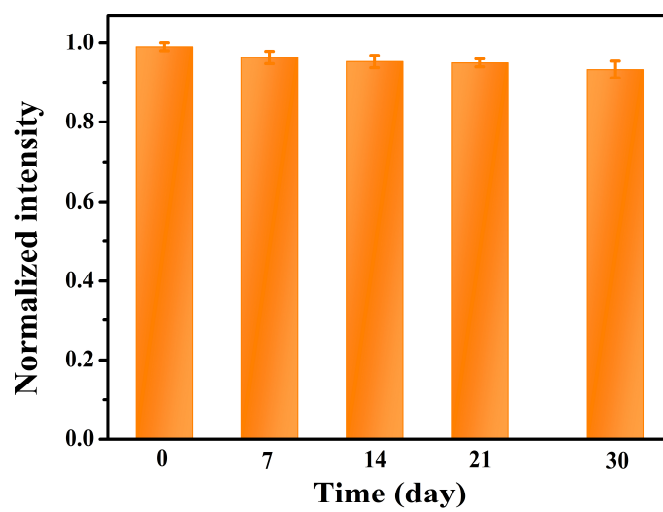

**Figure S5.** Storage stability of red CDs.

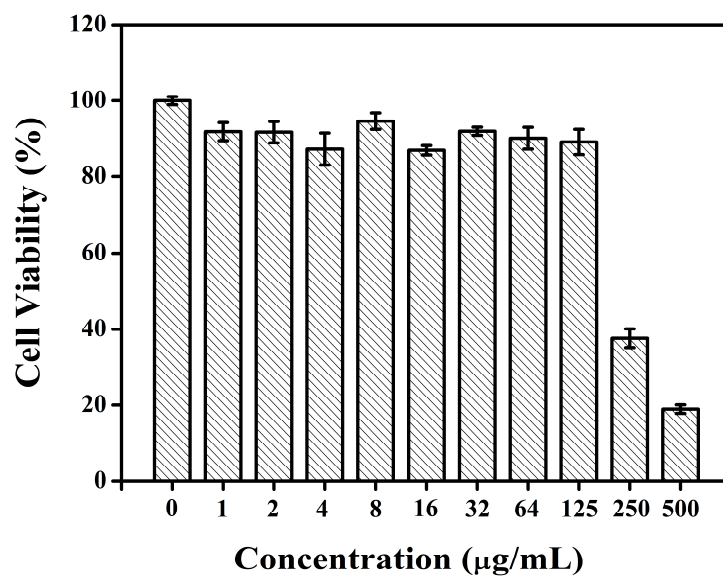

**Figure S6.** Cell viability of HeLa cells treated with various concentrations of CDs (from 0 to 500 mg·mL<sup>-1</sup>)

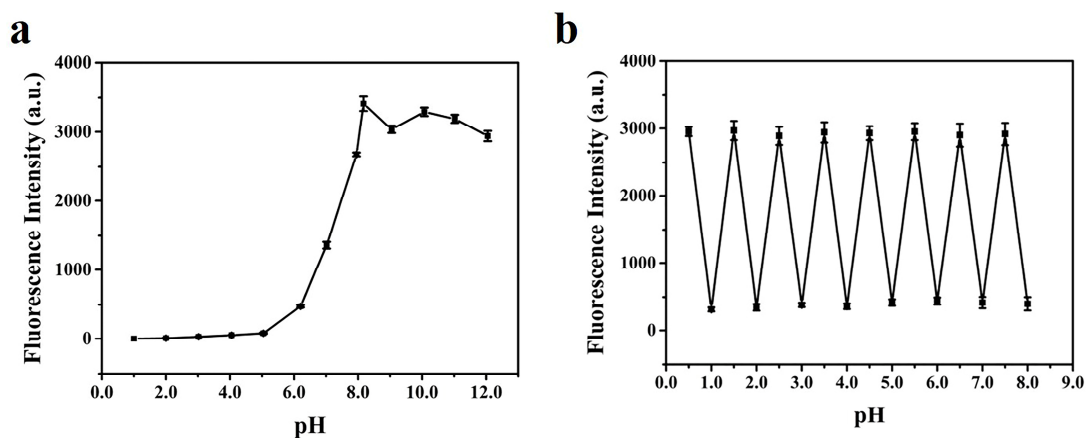

**Figure S7.** (a) The fluorescence intensity of CDs dispersed at different pH values, (b) Reversible response of fluorescence intensity of carbon dots at pH between 6.0 to 8.0.

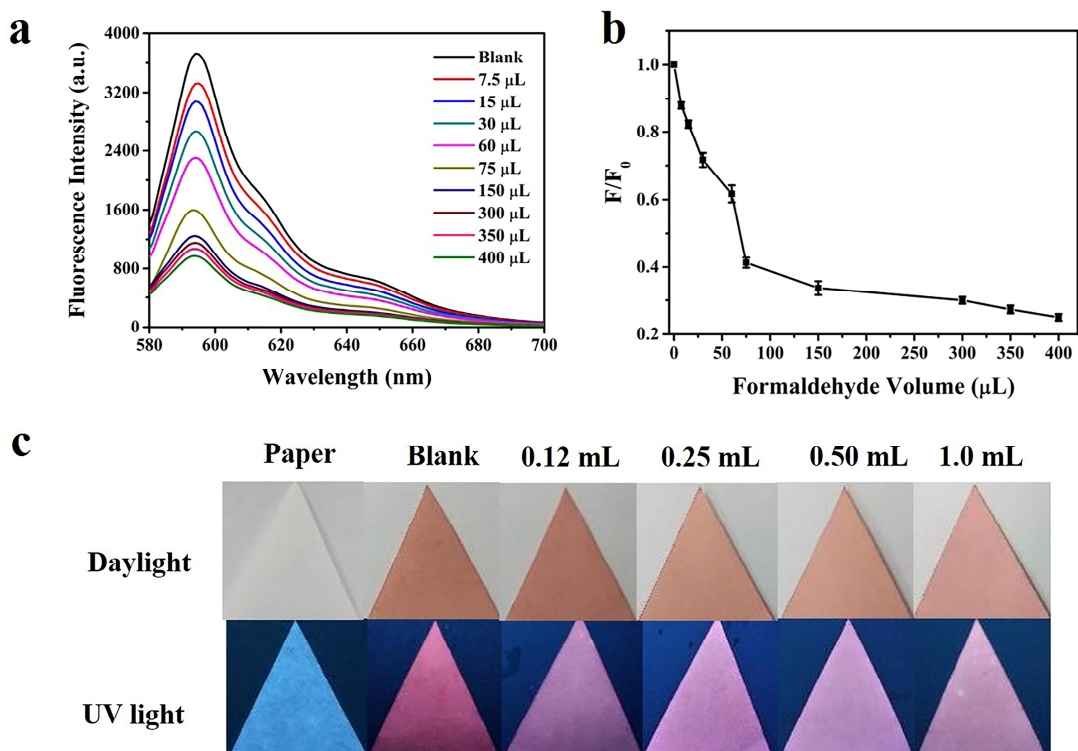

**Figure S8.** (a) The fluorescence spectra of CDs in the presence of various concentration of formaldehyde gas by adding different volumes of formaldehyde, (b) The relationship between  $F/F_0$  versus different of formaldehyde gas, Where  $F_0$  and  $F$  are the fluorescence intensities of CDs at 598 nm in the absence and the presence of ammonia and formaldehyde gas, (c) The photographs of the paper that soaked in a CDs solutions with the volume of formaldehyde from 0.12 mL to 1.0 mL that dropped on filter paper in 2.0 L beaker.

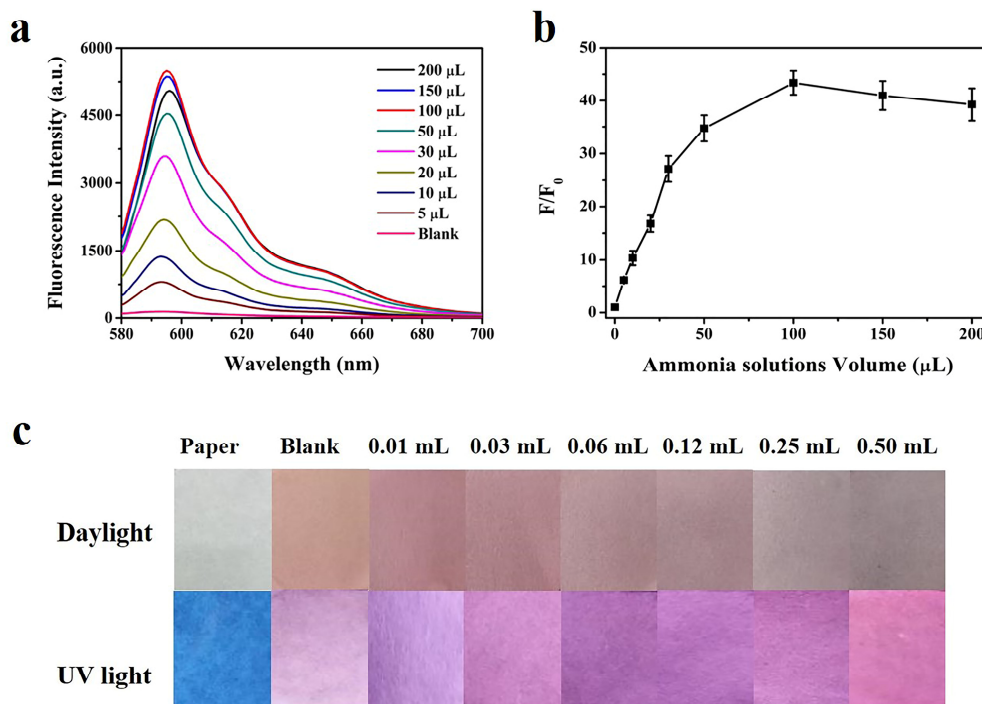

**Figure S9.** (a) The fluorescence spectra of NF-CDs in the presence of various concentration of ammonia by adding different volumes of ammonia solutions, (b) The relationship between  $F/F_0$  versus different of ammonia, Where  $F_0$  and  $F$  are the fluorescence intensities of CDs at 598 nm in the absence and the presence of ammonia gas, (c) The photographs of the paper that soaked in NF-CDs solutions with the volume of ammonia solutions from 0.01 mL to 0.5 mL.

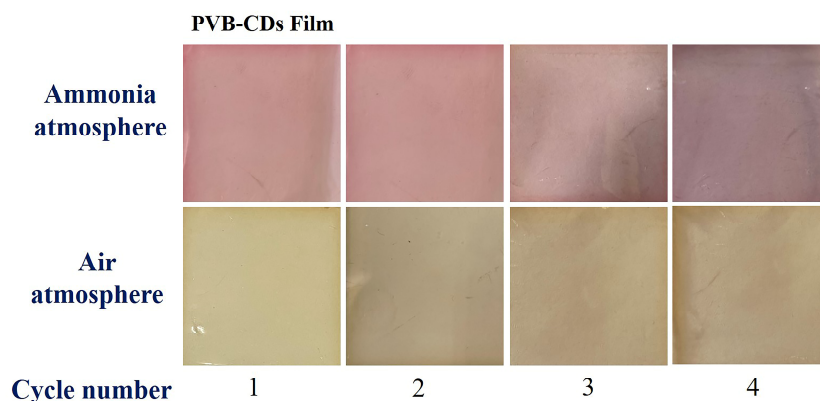

**Figure S10.** The reversible of PVB-CDs films with ammonia atmosphere and air atmosphere.

**Table S1.** Comparison of sensing performance of sensing material based Formaldehyde and present work

| Sensing material or methods     | LOD          | Linear range  | Ref.      |
|---------------------------------|--------------|---------------|-----------|
| Liquid crystal                  | 30 mM        | 0-50 mM       | [38]      |
| 6-hydroxy naphthalene           | 60 $\mu$ M   | 0-3 mM        | [39]      |
| enzymatic selfpowered biosensor | 3 $\mu$ M    | 0.01-0.35 mM  | [40]      |
| BODIPY-Substituted Hydrazine    | 0.18 $\mu$ M | 0-100 $\mu$ M | [41]      |
| CDs                             | 44 $\mu$ M   | 0-1 M         | This work |

**Table S2.** The pH changes of the NF-CDs in the absence and presence of different concentrations of ammonia solutions

| Ammonia solutions concentration | pH before adding Ammonia solutions | pH after adding Ammonia solutions |
|---------------------------------|------------------------------------|-----------------------------------|
| Blank                           |                                    | 4.3                               |
| 1 $\mu$ M                       |                                    | 4.6                               |
| 10 $\mu$ M                      |                                    | 5.3                               |
| 100 $\mu$ M                     | 4.0                                | 6.3                               |
| 1 mM                            |                                    | 8.9                               |
| 10 mM                           |                                    | 9.9                               |
| 100 mM                          |                                    | 10.9                              |

**Table S3.** The pH changes of the CDs in the absence and presence of different concentrations of Formaldehyde

| Formaldehyde concentration | pH before adding Formaldehyde | pH after adding Formaldehyde |
|----------------------------|-------------------------------|------------------------------|
| Blank                      |                               | 8.0                          |
| 1 mM                       |                               | 8.0                          |
| 10 mM                      |                               | 7.3                          |
| 20 mM                      |                               | 7.1                          |
| 40 mM                      | 8.0                           | 6.8                          |
| 60 mM                      |                               | 6.6                          |
| 80 mM                      |                               | 6.4                          |
| 100 mM                     |                               | 6.1                          |
| 1 M                        |                               | 6.0                          |
